# Supplementary material
Source: HighWire-hosted journal article supplement (https://jnm.snmjournals.org/highwire/filestream/94868/field_highwire_adjunct_files/0/164350_Supplemental_Data.pdf)
Supplement: 164350_Supplemental_Data.pdf [file 164350_Supplemental_Data.pdf]

## MATERIAL AND METHODS

### Measurement of the Arterial Input Function

Blood samples (200  $\mu\text{L}$ ) were collected at selected times from the femoral artery to establish total radioactivity kinetics in arterial plasma. Samples were centrifuged (3 min, 2054 g, 4°C) and radioactivity in cell-free plasma (100 $\mu\text{L}$ ) was counted.

Additional samples (500 $\mu\text{L}$ ) were withdrawn at 10, 20, 40 and 60 min after injection to determine the fraction of parent  $^{11}\text{C}$ -metoclopramide using radio-HPLC. Total radioactivity was counted in plasma samples (250  $\mu\text{L}$ ). Samples were deproteinated with acetonitrile (350 $\mu\text{L}$ ) and centrifuged (3 min, 2054 g, 4°C). The pellet of proteins was counted. The percent recovery in the supernatant was  $90.7 \pm 2.4\%$ . Then, 400  $\mu\text{L}$  of the supernatant were injected to the radio-HPLC system. The fraction of parent  $^{11}\text{C}$ -metoclopramide *versus* time was fitted using a 2-exponential decay equation.

### Radio-HPLC Conditions

Radio-HPLC system consisted in a gradient pump, an ASI100T autosampler and a UVD170U UV-vis detector (Thermo Scientific, France) online with an LB-509 radioisotope detector (Berthold, France). Separation was achieved using an Atlantis T3 10  $\mu\text{m}$ , 10  $\times$  250 mm column (Waters). The mobile phases consisted in 10 mM ammonium acetate in water (A) and acetonitrile (B). A linear gradient from 20% to 30% of B in 11 min was applied to the column at a flow rate of 5  $\text{mL} \cdot \text{min}^{-1}$ .
